# Supplementary material for: Technical Aspects and Clinical Limitations of Sperm DNA Fragmentation Testing in Male Infertility: A Global Survey, Current Guidelines, and Expert Recommendations
Source: PubMed Central journal article supplement — World J Mens Health. 2023 Aug 24;42(1):202–15. doi: 10.5534/wjmh.230076 (PMC10782128; doi:10.5534/wjmh.230076), 2023-08-24
Supplement: wjmh-42-202-s003.pdf [file wjmh-42-202-s003.pdf]

## Supplementary File 3. Raw data

### Section 3: Technical aspects of sperm DNA fragmentation (SDF) testing

| Q29. Which of the following SDF assays do you order? (If you use more than one, choose the most commonly ordered test in your practice) |     |         |
|-----------------------------------------------------------------------------------------------------------------------------------------|-----|---------|
| Terminal deoxynucleotidyl transferase dUTP nick end labeling (TUNEL)                                                                    | 120 | 28.60%  |
| Sperm chromatin structure assay (SCSA)                                                                                                  | 101 | 24.10%  |
| Sperm chromatin dispersion (SCD)                                                                                                        | 80  | 19.10%  |
| Comet                                                                                                                                   | 22  | 5.30%   |
| Other test                                                                                                                              | 14  | 3.30%   |
| Not applicable                                                                                                                          | 82  | 19.60%  |
| Total                                                                                                                                   | 419 | 100.00% |

| Q30. Which of the following factors determine your choice of the assay? [Select all that apply] |     |        |
|-------------------------------------------------------------------------------------------------|-----|--------|
| Availability                                                                                    | 294 | 70.00% |
| Cost of performing                                                                              | 185 | 44.05% |
| Accuracy                                                                                        | 149 | 35.48% |
| Evidence provided in literature on each assay                                                   | 108 | 25.71% |
| Training of staff and personnel                                                                 | 107 | 25.48% |
| Additional cost for patient                                                                     | 91  | 21.67% |
| Short time needed to obtain result                                                              | 79  | 18.81% |
| Ease of interpretation                                                                          | 77  | 18.33% |
| Ease of performing by biologists                                                                | 73  | 17.38% |
| Not applicable                                                                                  | 57  | 13.57% |

| Q31. Which of the following thresholds do you use to interpret the test results? |     |         |
|----------------------------------------------------------------------------------|-----|---------|
| 20% or higher is elevated SDF                                                    | 40  | 9.50%   |
| 25% or higher is elevated SDF                                                    | 77  | 18.30%  |
| 30% or higher is elevated SDF                                                    | 142 | 33.70%  |
| Other                                                                            | 6   | 1.40%   |
| Threshold determined by my lab                                                   | 47  | 11.20%  |
| Threshold provided by testing lab                                                | 67  | 15.90%  |
| Not applicable                                                                   | 42  | 10.00%  |
| Total                                                                            | 421 | 100.00% |

| Q32. Do you recommend an abstinence period before SDF testing (including last discarded ejaculation if applicable)? |     |         |
|---------------------------------------------------------------------------------------------------------------------|-----|---------|
| No                                                                                                                  | 28  | 6.60%   |
| Yes, less than 24 hours                                                                                             | 22  | 5.20%   |
| Yes, 24–48 hours                                                                                                    | 99  | 23.50%  |
| Yes, 3–5 days                                                                                                       | 226 | 53.60%  |
| Yes, 6 days or more                                                                                                 | 5   | 1.20%   |
| Not applicable                                                                                                      | 42  | 10.00%  |
| Total                                                                                                               | 422 | 100.00% |

## Section 5: Barriers and limitations in incorporating SDF testing into clinical practice:

| Q61. Which of the following factors limit YOUR ABILITY to order SDF testing? [Select all that apply] |     |        |
|------------------------------------------------------------------------------------------------------|-----|--------|
| Cost of testing                                                                                      | 223 | 56.60% |
| Not covered by insurance                                                                             | 163 | 41.37% |
| Unavailability of assays                                                                             | 139 | 35.28% |
| Lack of clear recommendations for testing                                                            | 127 | 32.23% |
| Lack of standardized SDF measurement technique                                                       | 121 | 30.71% |
| No agreed reference and cut-off values                                                               | 106 | 26.90% |
| Concern about interpretation of results                                                              | 74  | 18.78% |
| Lack of information on SDF testing                                                                   | 63  | 15.99% |
| Patients not convinced of additional tests                                                           | 55  | 13.96% |
| I have no limitations in ordering SDF testing                                                        | 50  | 12.69% |
| I am not convinced of SDF testing                                                                    | 21  | 5.33%  |
| Not applicable                                                                                       | 35  | 8.88%  |

  

| Q62. Assuming all resources are available, do you BELIEVE (regardless of your actual practice) SDF should be ordered in the evaluation of infertile men? [Select all that apply] |     |        |
|----------------------------------------------------------------------------------------------------------------------------------------------------------------------------------|-----|--------|
| Yes, for all men with causes and risks known to elevate SDF                                                                                                                      | 186 | 46.97% |
| Yes, after failure of ART for all cases                                                                                                                                          | 173 | 43.69% |
| Yes, for all men with UMI                                                                                                                                                        | 151 | 38.13% |
| Yes, for all men with IMI                                                                                                                                                        | 137 | 34.60% |
| Yes, after natural RPL                                                                                                                                                           | 130 | 32.83% |
| Yes, for surgery decision on clinical varicocele with normal semen parameters                                                                                                    | 126 | 31.82% |
| Yes, for all infertile men                                                                                                                                                       | 114 | 28.79% |
| Yes, before referral for ART in all cases of male infertility                                                                                                                    | 90  | 22.73% |
| Yes, after first natural pregnancy loss                                                                                                                                          | 65  | 16.41% |
| Yes, for surgery decision on subclinical varicocele                                                                                                                              | 60  | 15.15% |
| No, SDF testing should occur only for select few patients after careful evaluation                                                                                               | 37  | 9.34%  |
| No, SDF testing should have no role in evaluation of male infertility                                                                                                            | 7   | 1.77%  |
| Not applicable                                                                                                                                                                   | 18  | 4.55%  |

  

| Q63. In your opinion, why is there a delay in incorporating SDF testing into clinical practice? [Select all that apply] |     |        |
|-------------------------------------------------------------------------------------------------------------------------|-----|--------|
| No clear recommendations by society guidelines                                                                          | 247 | 62.69% |
| No globally accepted reference ranges                                                                                   | 198 | 50.25% |
| No reliable results and large variability between labs                                                                  | 195 | 49.49% |
| Too expensive in time and/or material to be used routinely                                                              | 144 | 36.55% |
| Unavailable SDF testing                                                                                                 | 138 | 35.03% |
| Insurance companies will not cover costs of testing                                                                     | 121 | 30.71% |
| Resistance by many clinicians to incorporate this new technology into their practice                                    | 104 | 26.40% |
| Difficulty in performing SDF testing                                                                                    | 103 | 26.14% |
| Poor quality research available regarding the topic                                                                     | 90  | 22.84% |
| Economic drawbacks of SDF testing outweigh the benefits that may be conferred to patients                               | 73  | 18.53% |
| For large number of SDF tests conducted, only a small proportion of patients will benefit                               | 54  | 13.71% |
| Knowing whether SDF is high or low will typically not affect the management plan                                        | 36  | 9.14%  |
| Not applicable                                                                                                          | 19  | 4.82%  |

  

| Q64. In your opinion and based on your experience, why should SDF testing be incorporated more into clinical practice? [Select all that apply] |     |        |
|------------------------------------------------------------------------------------------------------------------------------------------------|-----|--------|
| Provide an explanation to many unknown causes of male infertility                                                                              | 296 | 75.32% |
| Provide basis for counselling patients, especially regarding lifestyle risks                                                                   | 247 | 62.85% |
| Allow targeted treatment approaches and personalized medicine                                                                                  | 217 | 55.22% |
| Avoid unnecessary cost, time, and resources of ART                                                                                             | 160 | 40.71% |
| Availability of commercial assays that are relatively affordable and easy to interpret                                                         | 101 | 25.70% |
| I do not believe it should be incorporated more into clinical practice                                                                         | 26  | 6.62%  |
| Not applicable                                                                                                                                 | 19  | 4.83%  |
