# Supplementary material for: Technical Aspects and Clinical Limitations of Sperm DNA Fragmentation Testing in Male Infertility: A Global Survey, Current Guidelines, and Expert Recommendations
Source: PubMed Central journal article supplement — World J Mens Health. 2023 Aug 24;42(1):202–15. doi: 10.5534/wjmh.230076 (PMC10782128; doi:10.5534/wjmh.230076), 2023-08-24
Supplement: wjmh-42-202-s004.pdf [file wjmh-42-202-s004.pdf]

## Supplementary File 4. Complete demographic data

### Countries of the participants:

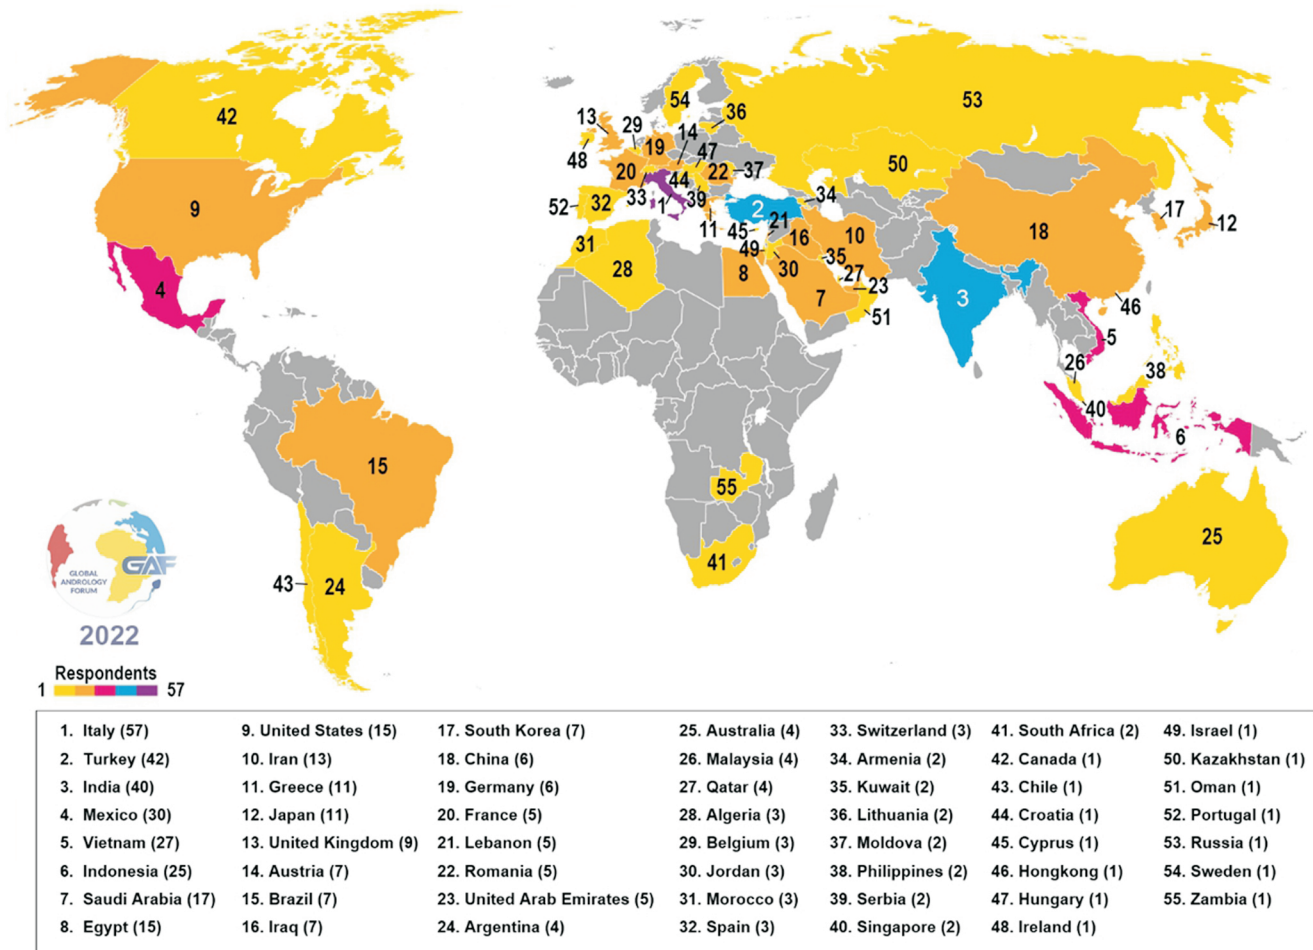

This figure represents the geographical distribution of respondents (total n=436). The number of respondents is shown in brackets after the name of each country. The purple color indicates the country with the greatest number of respondents (Italy; n=57), the blue color indicates the countries with the second and third highest responses (n=40 or above), the pink color indicates countries with responses between 20 and 30, the orange color represents those countries with 5–19 responses, while the yellow color indicates countries with less than 5 respondents.

**The results of the other demographic questions are presented in the following table:**

Results of demographic questions

|                                                                          | Option                                                               | Number (%) |
|--------------------------------------------------------------------------|----------------------------------------------------------------------|------------|
| How old are you (years)?                                                 |                                                                      |            |
|                                                                          | 25–34                                                                | 87 (20.0)  |
|                                                                          | 35–44                                                                | 166 (38.1) |
|                                                                          | 45–54                                                                | 93 (21.3)  |
|                                                                          | 55–64                                                                | 62 (14.2)  |
|                                                                          | >65                                                                  | 28 (6.4)   |
|                                                                          | Total                                                                | 436 (100)  |
| What is the nature of your employment?                                   |                                                                      |            |
|                                                                          | Physician, attending                                                 | 275 (63.2) |
|                                                                          | Physician, fellow                                                    | 22 (5.1)   |
|                                                                          | Physician, resident                                                  | 30 (6.9)   |
|                                                                          | Advanced practice provider (physician assistant, nurse practitioner) | 5 (1.1)    |
|                                                                          | Reproductive Biologist/Embryologist                                  | 51 (11.7)  |
|                                                                          | Researcher (full-time)                                               | 24 (5.5)   |
|                                                                          | Other                                                                | 28 (6.4)   |
|                                                                          | Total                                                                | 435 (100)  |
| What is your area of specialization (as it relates to male infertility)? |                                                                      |            |
|                                                                          | Fellowship-trained reproductive urology                              | 78 (17.9)  |
|                                                                          | General urology                                                      | 97 (22.2)  |
|                                                                          | Gynecology                                                           | 23 (5.3)   |
|                                                                          | Endocrinology                                                        | 24 (5.5)   |
|                                                                          | Clinical andrologist                                                 | 87 (20.0)  |
|                                                                          | Clinical Laboratory                                                  | 7 (1.6)    |
|                                                                          | Embryology/Biology                                                   | 39 (8.9)   |
|                                                                          | ART specialist                                                       | 70 (16.1)  |
|                                                                          | Primary care                                                         | 1 (0.2)    |
|                                                                          | Other                                                                | 10 (2.3)   |
|                                                                          | Total                                                                | 436 (100)  |
| What is your practice setting?                                           |                                                                      |            |
|                                                                          | Academic                                                             | 148 (33.9) |
|                                                                          | Public                                                               | 70 (16.1)  |
|                                                                          | Private                                                              | 136 (31.2) |
|                                                                          | Multiple                                                             | 81 (18.6)  |
|                                                                          | Other                                                                | 1 (0.2)    |
|                                                                          | Total                                                                | 436 (100)  |
| How many years have you been practicing (related to male infertility)?   |                                                                      |            |
|                                                                          | Less than 2 years                                                    | 43 (9.9)   |
|                                                                          | 2–5 years                                                            | 90 (20.7)  |
|                                                                          | 6–10 years                                                           | 85 (19.6)  |
|                                                                          | 11–15 years                                                          | 63 (14.5)  |
|                                                                          | More than 15 years                                                   | 153 (35.3) |
|                                                                          | Total                                                                | 434 (100)  |

| Option                                                                                                       | Number (%) |
|--------------------------------------------------------------------------------------------------------------|------------|
| On average, how many infertile couples do you manage per week?                                               |            |
| <10                                                                                                          | 140 (32.6) |
| 11–20                                                                                                        | 124 (28.8) |
| 21–30                                                                                                        | 70 (16.3)  |
| 31–40                                                                                                        | 35 (8.1)   |
| 41–50                                                                                                        | 13 (3.0)   |
| >50                                                                                                          | 48 (11.2)  |
| Total                                                                                                        | 430 (100)  |
| How many IVF/ICSI full cycles (=oocyte pickup) are performed in one year at your center by your entire team? |            |
| <100                                                                                                         | 65 (15.1)  |
| 101–400                                                                                                      | 99 (23.0)  |
| 401–800                                                                                                      | 59 (13.7)  |
| >800                                                                                                         | 72 (16.7)  |
| I refer my IVF/ICSI couples to another center                                                                | 84 (19.5)  |
| Not applicable                                                                                               | 52 (12.1)  |
| Total                                                                                                        | 431 (100)  |
| What is the cost of SDF testing in your area?                                                                |            |
| Less than \$50                                                                                               | 68 (16.0)  |
| \$50–100                                                                                                     | 141 (33.1) |
| \$100–200                                                                                                    | 132 (31.0) |
| \$200–500                                                                                                    | 62 (14.6)  |
| \$500–1,000                                                                                                  | 15 (3.5)   |
| More than \$1,000                                                                                            | 8 (1.9)    |
| Total                                                                                                        | 426 (100)  |

ART: assisted reproductive technology, IVF: in-vitro fertilization, ICSI: intracytoplasmic sperm injection, SDF: sperm DNA fragmentation.
